# Supplementary material for: Evaluation of anti-cancer and anti-metastatic effects of folate-PEGylated niosomes for co-delivery of letrozole and ascorbic acid on breast cancer cells
Source: Royal Society of Chemistry journal article supplement (doi:10.1039/d2me00024e), 2022-01-01
Supplement: d2me00024e1.pdf [file d2me00024e1.pdf]

## Supporting Information

### Evaluation of Anti-Cancer and Anti-Metastatic Effects of Folate-PEGylated Niosome for Co-Delivery of Letrozole and Ascorbic Acid on Breast Cancer Cells

Mahsa Bourbour<sup>a,†</sup>, Nazanin Khayam<sup>b,†</sup>, Hassan Noorbazargan<sup>c,†,\*</sup>, Mohammad Tavakkoli Yaraki<sup>d,\*</sup>, Zahra Asghari Lalami<sup>f</sup>, Iman Akbarzadeh<sup>f</sup>, Faten Eshrati Yeganeh<sup>g</sup>, Aghigh Dolatabadi<sup>c</sup>, Fatmeh mirzaei rad<sup>e</sup>, Yen Nee Tan<sup>h,i,\*</sup>

<sup>a</sup> Department of Biotechnology, Alzahra University, Tehran, Iran.

<sup>b</sup> Department of Biology, Tehran North Branch, Islamic Azad University, Tehran, Iran

<sup>c</sup> Department of Biotechnology, School of Advanced Technologies in Medicine, Shahid Beheshti University of Medical Sciences, Tehran, Iran.

<sup>d</sup> School of Natural Sciences, Macquarie University, Sydney, NSW 2109, Australia

<sup>e</sup> Department of Biology, Parand Branch, Islamic Azad University, Parand, Iran.

<sup>f</sup> Department of Chemical and Petrochemical Engineering, Sharif University of Technology, Tehran, Iran.

<sup>g</sup> Department of Chemistry, Science and Research Branch, Islamic Azad University, Tehran, Iran.

<sup>h</sup> Faculty of Science, Agriculture and Engineering, Newcastle University, Newcastle Upon Tyne NE1 7RU, United Kingdom

<sup>i</sup> Newcastle Research and Innovation Institute, Newcastle University in Singapore, 80 Jurong East Street 21, #05-04, 609607, Singapore

†: M.B., H.N., and N.K. contributed equally to this work

\*Corresponding authors:

Hassan Noorbazargan; Email: [h.noorbazargan@sbmu.ac.ir](mailto:h.noorbazargan@sbmu.ac.ir)

Dr. Mohammad Tavakkoli Yaraki, E-mail: [mohammad.tavakkoliyaraki@mq.edu.au](mailto:mohammad.tavakkoliyaraki@mq.edu.au)

Prof. Yen Nee Tan, E-mail: [yennee.tan@newcastle.ac.uk](mailto:yennee.tan@newcastle.ac.uk)

## SI-1. Experimentation

**Table S1.** Compositions of different formulations ( L-Niosome, A-Niosome, LA-Niosome, FA-LA-Niosome, Empty Niosome)

| Systems                                                                | Formulations | Surfactant:<br>Cholesterol<br>(molar ratio) | Span60:Tween60<br>(molar ratio) | Cholesterol<br>(mg) | Span 60 (mg) | Tween 60 (mg) | Drug Concentration<br>(mg/mL) |
|------------------------------------------------------------------------|--------------|---------------------------------------------|---------------------------------|---------------------|--------------|---------------|-------------------------------|
| <b>Letrozole-Loaded<br/>Niosome<br/>(L-Niosome)</b>                    | F1           | 1:1                                         | 0.5:1                           | 58.00               | 21.22        | 131.66        | 1.5                           |
|                                                                        | F2           | 2:1                                         | 0.5:1                           | 38.28               | 28.43        | 176.42        | 1.5                           |
|                                                                        | F3           | 1:1                                         | 1:1                             | 58.00               | 32.15        | 98.25         | 1.5                           |
|                                                                        | F4           | 2:1                                         | 1:1                             | 38.28               | 43.08        | 131.66        | 1.5                           |
|                                                                        | F5           | 1:1                                         | 1.5:1                           | 58.00               | 38.58        | 78.60         | 1.5                           |
|                                                                        | F6           | 2:1                                         | 1.5:1                           | 38.28               | 51.70        | 105.32        | 1.5                           |
| <b>Ascorbic Acid-Loaded<br/>Niosome<br/>(AA-Niosome)</b>               | F7           | 1:1                                         | 0.5:1                           | 58.00               | 21.22        | 131.66        | 1.5                           |
|                                                                        | F8           | 2:1                                         | 0.5:1                           | 38.28               | 28.43        | 176.42        | 1.5                           |
|                                                                        | F9           | 1:1                                         | 1:1                             | 58.00               | 32.15        | 98.25         | 1.5                           |
|                                                                        | F10          | 2:1                                         | 1:1                             | 38.28               | 43.08        | 131.66        | 1.5                           |
|                                                                        | F11          | 1:1                                         | 1.5:1                           | 58.00               | 38.58        | 78.60         | 1.5                           |
|                                                                        | F12          | 2:1                                         | 1.5:1                           | 38.28               | 51.70        | 105.32        | 1.5                           |
| <b>Letrozole/Ascorbic Acid-<br/>co-Loaded-Niosome<br/>(LA-Niosome)</b> | F13          | 1:1                                         | 1:1                             | 58.00               | 32.15        | 98.25         | 1.5/1.5                       |
|                                                                        | F14          | 2:1                                         | 1:1                             | 38.28               | 43.08        | 131.66        | 1.5/1.5                       |
|                                                                        | F15          | 2:1                                         | 1.5:1                           | 38.28               | 51.70        | 105.32        | 1.5/1.5                       |
| <b>Empty Niosome (without drug)</b>                                    |              | 2:1                                         | 1:1                             | 38.28               | 43.08        | 131.66        | -                             |
| <b>Folate-PEGylated LA-Niosomes<br/>(FA-LA-Niosome)</b>                |              | 2:1                                         | 1:1                             | 38.28               | 43.08        | 131.66        | 1.5/1.5                       |

**Lipid is the total amount of cholesterol and surfactant (Span 60 and Tween 60); Sonication time (5 min).**

**Table S2.** Primers and their sequences used in the real time PCR.

| <b>Gene</b>            | <b>Primer sequence</b>                                                            |
|------------------------|-----------------------------------------------------------------------------------|
| <b><i>MMP2</i></b>     | F: 5'- F: TTG ACG GTA AGG ACGGAC TC-3'<br>R: 5'- CAT ACT TCA CAC GGA CCA CTTG -3' |
| <b><i>cyclinD</i></b>  | F: 5'- CAGATCATCCGCAAACACGC-3'<br>R: 5'- AAGTTGTTGGGGCTCCTCAG-3'                  |
| <b><i>b-actin</i></b>  | F: 5'- TCCTCCTGAGCGCAAGTAC-3'<br>R: 5'- CCTGCTTGCTGATCCACATCT-3'                  |
| <b><i>MMP9</i></b>     | F: 5'- GCACGACGTCTTCCAGTACC -3'<br>R: 5'- CAGGATGTCATAGGTCACGTAGC -3'             |
| <b><i>Caspase3</i></b> | F: 5'- CATACTCCACAGCACCTGGTTA-3'<br>R: 5'- ACTCAAATTCTGTTGCCACCTT-3'              |
| <b><i>Caspase9</i></b> | F: 5'-CATATGATCGAGGACATCCAG-3<br>R: 5'-TTAGTTCGCAGAAACGAAGC-3'                    |

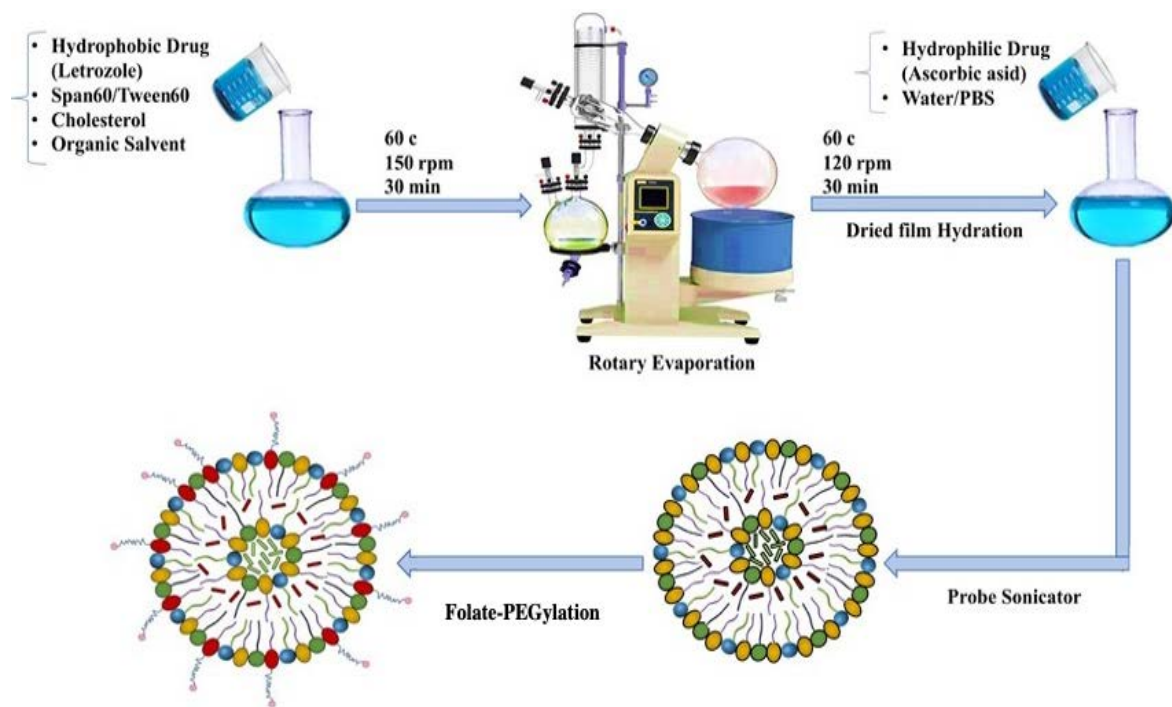

**Figure S1.** Schematic illustration of the steps in preparing the folate-PEGylated niosomes as drug delivery nanocarriers.

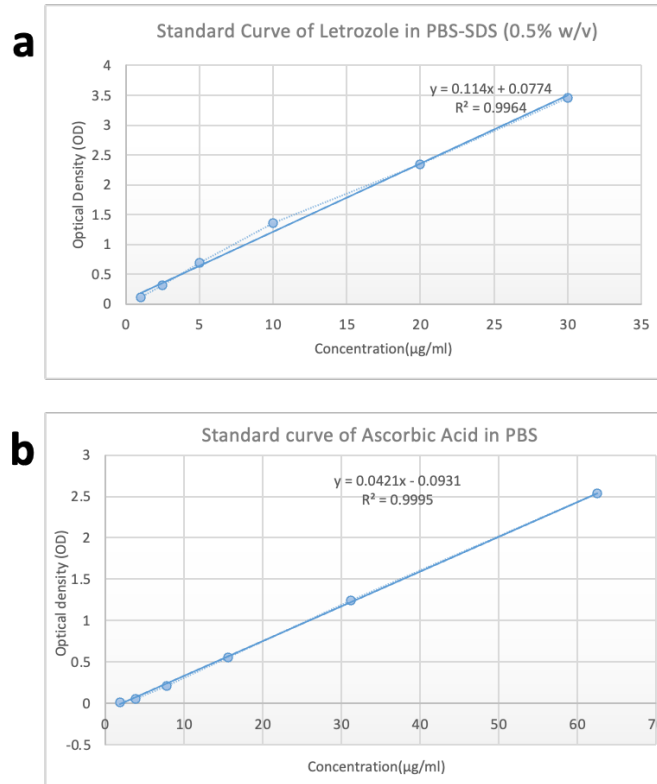

**Figure S2.** The extinction coefficients (slopes) and calibration curves used to determine the concentration of (a) letrozole and (b) ascorbic acid at the 240 nm and 520 nm wavelength, respectively.

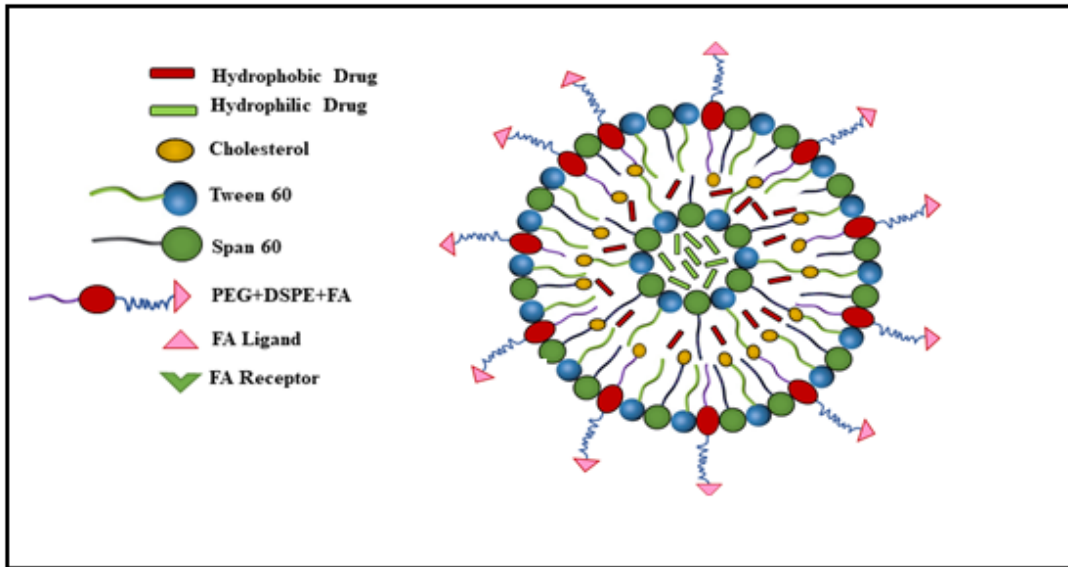

**Figure S3.** Folate-PEGylated niosomes and drugs positions within the nanostructure

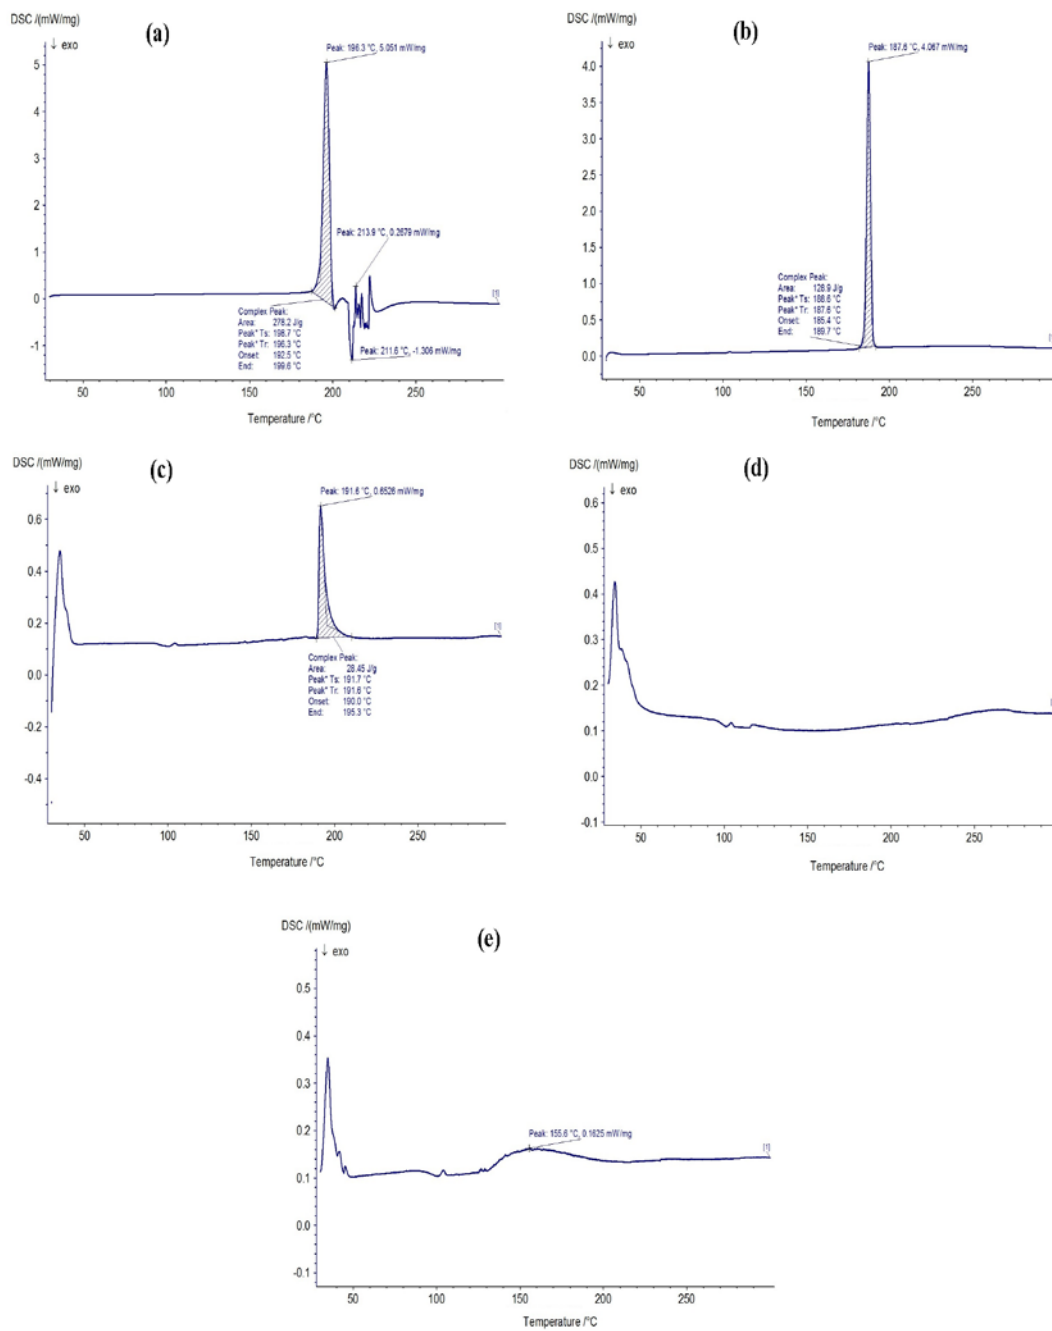

**Figure S4.** DSC thermograms of (a) Ascorbic acid, (b) Letrozole, (c) AA-Niosome, (d) L-Niosome and (e) LA-Niosome

**Table S3.** The release kinetic models and parameters obtained for niosomal formulations.

| Sample        | Released Drug | Kinetic Models               |                                    |      |                               |                           |
|---------------|---------------|------------------------------|------------------------------------|------|-------------------------------|---------------------------|
|               |               | Zero-Order<br>R <sup>2</sup> | Korsmeyer-Peppas<br>R <sup>2</sup> | n    | First-Order<br>R <sup>2</sup> | Higuchi<br>R <sup>2</sup> |
| L(aq)         | Letrozole     | 0.63                         | 0.88                               | 0.44 | 0.92                          | 0.81                      |
| A(aq)         | Ascorbic Acid | 0.57                         | 0.8                                | 0.38 | 0.91                          | 0.76                      |
| L(aq)/ A(aq)  | Letrozole     | 0.60                         | 0.85                               | 0.45 | 0.92                          | 0.79                      |
| L(aq)/ A(aq)  | Ascorbic Acid | 0.60                         | 0.89                               | 0.42 | 0.91                          | 0.79                      |
| L-Niosome     | Letrozole     | 0.70                         | 0.89                               | 0.45 | 0.79                          | 0.87                      |
| A-Niosome     | Ascorbic Acid | 0.75                         | 0.94                               | 0.43 | 0.86                          | 0.90                      |
| LA-Niosome    | Letrozole     | 0.75                         | 0.91                               | 0.50 | 0.82                          | 0.90                      |
| LA-Niosome    | Ascorbic Acid | 0.71                         | 0.93                               | 0.43 | 0.82                          | 0.87                      |
| FA-LA-Niosome | Letrozole     | 0.82                         | 0.97                               | 0.45 | 0.91                          | 0.94                      |
| FA-LA-Niosome | Ascorbic Acid | 0.76                         | 0.95                               | 0.43 | 0.91                          | 0.91                      |

\*data fitted for release < 60%

**The kinetic models are defined as below:**

|                                                                                                      |                                                                                                                                                                                                                                                                                                                                                                                                                                                              |
|------------------------------------------------------------------------------------------------------|--------------------------------------------------------------------------------------------------------------------------------------------------------------------------------------------------------------------------------------------------------------------------------------------------------------------------------------------------------------------------------------------------------------------------------------------------------------|
| <p><b>Zero-order model</b><br/> <math>C_t = C_0 + K_0t</math></p>                                    | Where $C_t$ represents the amount of drug released at time $t$ , $C_0$ is the initial concentration of drug released, which is generally zero. In this model, the release process occurs at a constant rate and is independent of the initial drug concentration                                                                                                                                                                                             |
| <p><b>First-order model</b><br/> <math>\text{Log } C = \text{Log } C_0 - \frac{Kt}{2.303}</math></p> | Where $C_0$ is the initial concentration of the drug, $k$ is the first-order rate constant, and $t$ is the time. $C$ is the drug remaining in the carrier at time $t$ . $\text{Log } C$ and $t$ have a linear relationship, and $K/2.303$ is the slope of the straight line. This model can be used to describe water-soluble drugs in porous matrices.                                                                                                      |
| <p><b>Higuchi model</b><br/> <math>Q = K_H\sqrt{t}</math></p>                                        | Where, $K_H$ is the Higuchi constant, and it is obtained from the slope of the line. The data obtained were plotted as cumulative percentage drug release versus square root of time. This model can be useful in the case of matrix tablets containing water-soluble drugs.                                                                                                                                                                                 |
| <p><b>Korsmeyer-Peppas model</b><br/> <math>M_t/M_\infty = Kt^n</math></p>                           | Where $M_t/M_0$ represents the fraction of drug released at time $t$ , $k$ represents the release rate, and $n$ represents the release exponent. For cylindrical-shaped matrices, the $n$ value is used to characterize the various releases. For spherical tablets:<br>$n \leq 0.43$ : Fickian diffusion mechanism<br>$0.43 < n < 0.85$ : non-Fickian transport.<br>$n = 0.85$ : Case II (relaxational) transport.<br>$n > 0.85$ : super case II transport. |



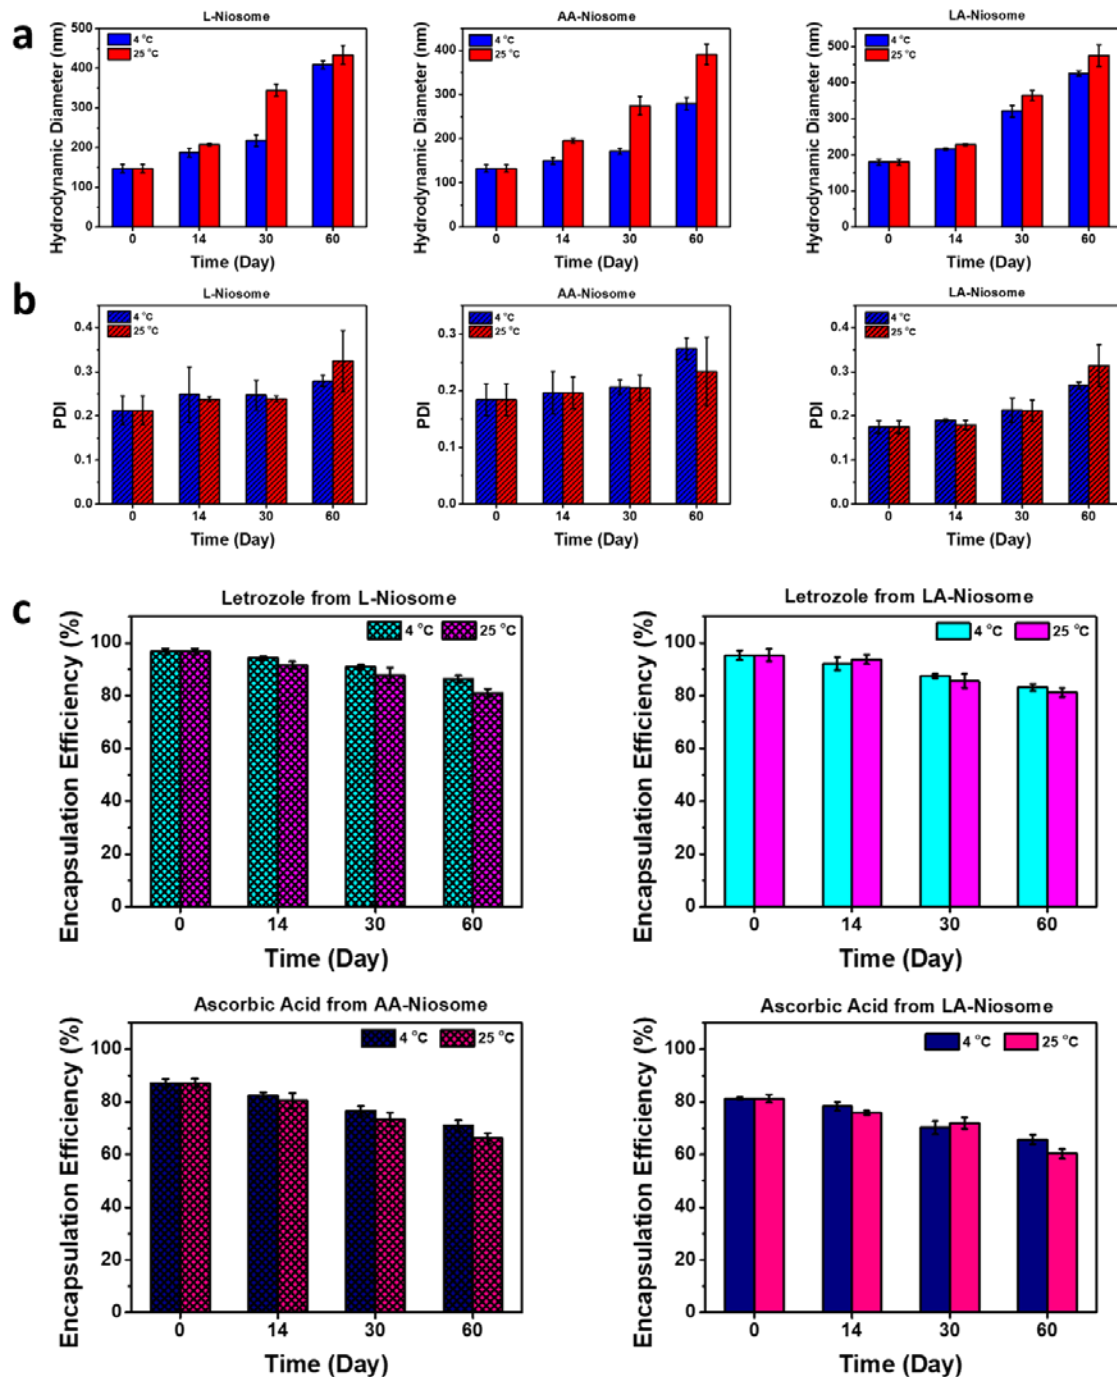

**Figure S5.** Stability of optimum formulations stored (L-Niosome, A-Niosome and LA-Niosome) during 2 months of storage at  $4 \pm 2$  °C, and  $25 \pm 2$  °C (Data presented as average  $\pm$  SD) based on changes in their hydrodynamic diameter (a) and polydispersity index (b). c) The change in encapsulation efficiency of letrozole (top row) and ascorbic acid (bottom row) from different niosomal formulations.

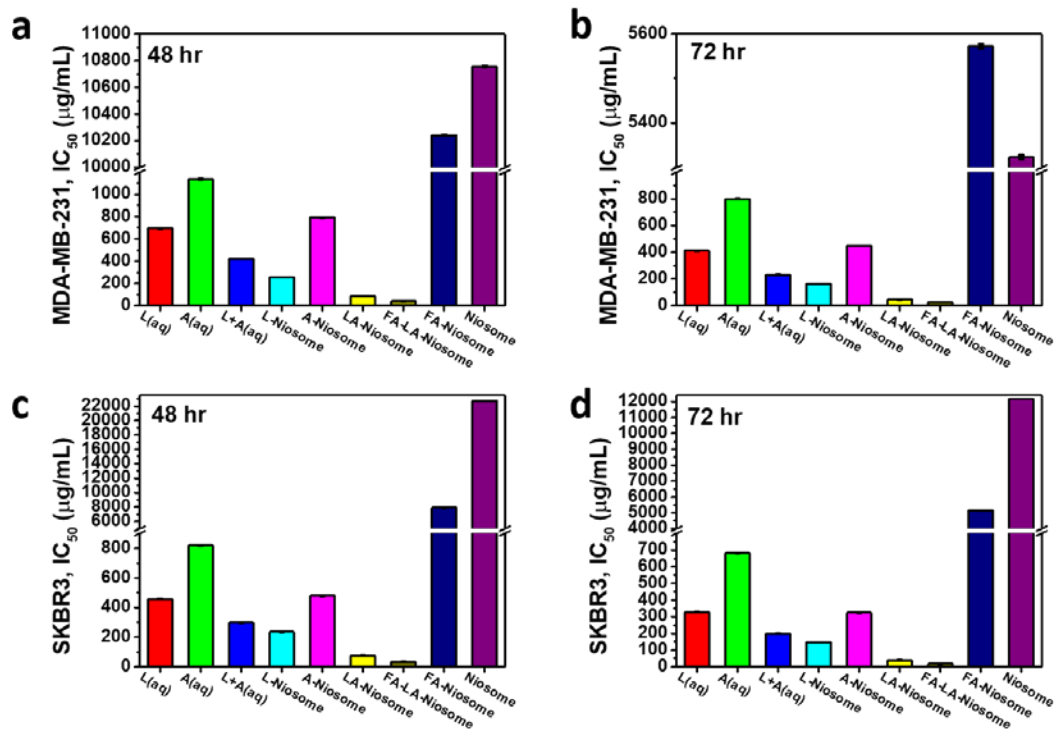

**Figure S6.** Comparison of IC<sub>50</sub> value (y-axis) in different samples (x-axis from left to right: L(aq), A(aq), L+A(aq), L-Niosome, A-Niosome, LA-Niosome and FA-LA-Niosome, FA-Niosome, and Niosome). The results were obtained at 48hr and 72 hr in the MDA-MB-231(a, b) and SKBR3(c, d) cell lines respectively using MTT assay. Equal concentrations of drugs were used for the measurement of IC<sub>50</sub> values for the respective niosomal drug formulation.

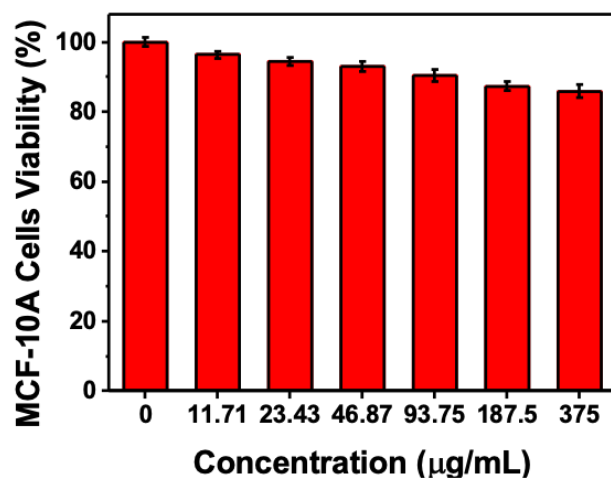

**Figure S7.** The viability of MCF-10 cell lines after incubation with different concentrations of FA-LA-Niosome for 72 hr. The concentration (X-axis value) refers to concentration of drugs that could potentially be loaded into the niosomal nanocarriers.
